# Supplementary material for: Machine learning and materials modelling interpretation of in vivo toxicological response to TiO2 nanoparticles library (UV and non-UV exposure)
Source: Royal Society of Chemistry journal article supplement (doi:10.1039/d1nr03231c), 2021-01-01
Supplement: d1nr03231c1.xlsx [file d1nr03231c1.xlsx]

## Sheet: Table S1
Table S1: Characteristics of the Fe doped TiO2 nanoparticles library. Each of the 11 nanoparticles has been characterized as synthesised (TEM, BET, SA, Band Gap, etc.), in test media in a concentration range, with and without UV radiation (DLS, zeta potential) and as modelled (number of atoms, lattice energy force vector, etc.).
Please note there is a correspondence for colours and variable types at the right end of the table.
1	2	3	4	5	6	7	8	9	10	11	12	13	14	15	16	17	18	19	20	21	22	23	24	25	26	27	28	29	30	31	32	33	34	35	36	37	38	39	40	41	42	43	44	45	46	47	48	49	50
NM number	NM name	Nominal Diameter (nm)	Fe (%)	TiO2 (%)	Anatase (%)	Rutile (%)	Anatase density (g/cm^3)	Rutile density (g/cm^3)	BET (nm)	SA (m^2/g)	Band Gap (eV)	UV absorbance (wavelength)	NM density (g/cm^3)	Particle number (10^6)	Individual Particle surface	Total Particle surface	Concentration (mg/L)	DLS NON-UV (nm)	PDI for DLS NON-UV	NON-UV-DLS Peak 1- new added	NON-UV-DLS % in peak 1	NON-UV-DLS peak 2 - new data	NON-UV-DLS % in peak 2	Zeta NON-UV (mV)	Zeta STDEV NON-UV	Mob_NON-UV (µmcm/Vs)	Mob_STDEV NON-UV_SD	Conductivity NON-UV (mS/cm)	Conductivity STDEV NON-UV	DLS UV (nm)	PDI for DLS UV	UV-DLS Peak 1 - new added	UV-DLS % in peak 1	UV-DLS Peak 2 - new added	UV-DLS % in peak 2	Zeta UV (mV)	Zeta STDEV UV	Mob UV (µmcm/Vs)	Mob STDEV UV	Conductivity UV (mS/cm)	Conductivity STDEV UV	n_atoms_all	n_atoms_core	n_atoms_shell	n_Ti_atoms_all	n_Ti_atoms_core	n_Ti_atoms_shell	n_O_atoms_all	n_O_atoms_core
1	TiO2_12 nm	12	0	100	86	14	3.78	4.23	10.5	145	3.3	360	3.843	28.8	452	13017.6	1000	1276	0.694	945	74.5	270	25.5	-3.28	0.906	-0.2572	0.07109	0.518	0.0234	1918	0.733	787	100			-2.81	0.148	-0.2198	0.01124	0.55	0.012	4.93941	4.82604	4.30068	4.46229	4.34809	3.82633	4.76332	4.65037
1	TiO2_12 nm	12	0	100	86	14	3.78	4.23	10.5	145	3.3	360	3.843	2.88	452	1301.76	100	1276	0.694	945	74.5	270	25.5	1.19	0.29	0.09356	0.02275	0.694	0.0229	1918	0.733	787	100			1.78	0.177	0.14	0.01393	0.444	0.0198	4.93941	4.82604	4.30068	4.46229	4.34809	3.82633	4.76332	4.65037
1	TiO2_12 nm	12	0	100	86	14	3.78	4.23	10.5	145	3.3	360	3.843	0.288	452	130.176	10	1276	0.694	945	74.5	270	25.5	-1.94	0.396	-0.1522	0.03083	0.702	0.0238	1918	0.733	787	100			-1.98	0.282	-0.1548	0.02208	0.709	0.0184	4.93941	4.82604	4.30068	4.46229	4.34809	3.82633	4.76332	4.65037
1	TiO2_12 nm	12	0	100	86	14	3.78	4.23	10.5	145	3.3	360	3.843	0.0288	452	13.0176	1	1276	0.694	945	74.5	270	25.5	-14.2	0.777	-1.11	0.06229	0.678	0.0192	1918	0.733	787	100			-8.86	0.933	-0.6945	0.07354	0.704	0.0219	4.93941	4.82604	4.30068	4.46229	4.34809	3.82633	4.76332	4.65037
2	1%FeTiO2_11nm	11	1	99	81	19	3.917	4.277	9	157	3.2	382	3.9854	37.2	380	14136	1000	1120	0.736	895	82.4	252	17.6	-2.03	0.485	-0.1591	0.0382	0.671	0.00777	2358	0.658	988	100			-3.51	0.17	-0.2754	0.01336	0.538	0.0113	4.82314	4.7001	4.21532	4.34183	4.21875	3.73416	4.646	4.52298
2	1%FeTiO2_11nm	11	1	99	81	19	3.917	4.277	9	157	3.2	382	3.9854	3.72	380	1413.6	100	1120	0.736	895	82.4	252	17.6	-0.566	0.376	-0.04447	0.02959	0.647	0.0197	2358	0.658	988	100			1.53	0.148	0.1201	0.01188	0.669	0.0262	4.82314	4.7001	4.21532	4.34183	4.21875	3.73416	4.646	4.52298
2	1%FeTiO2_11nm	11	1	99	81	19	3.917	4.277	9	157	3.2	382	3.9854	0.372	380	141.36	10	1120	0.736	895	82.4	252	17.6	-6.72	0.234	-0.5266	0.0187	0.631	0.0162	2358	0.658	988	100			-3.86	0.136	-0.3019	0.01069	0.69	0.0184	4.82314	4.7001	4.21532	4.34183	4.21875	3.73416	4.646	4.52298
2	1%FeTiO2_11nm	11	1	99	81	19	3.917	4.277	9	157	3.2	382	3.9854	0.0372	380	14.136	1	1120	0.736	895	82.4	252	17.6	-8.7	0.129	-0.6824	0.01018	0.695	0.0192	2358	0.658	988	100			-13.4	0.0707	-1.056	0.002121	0.649	0.017	4.82314	4.7001	4.21532	4.34183	4.21875	3.73416	4.646	4.52298
3	2%FeTiO2_10nm	10	2	98	69	31	3.915	4.272	7.6	160	3.15	380	4.02567	48.8	314	15323.2	1000	2420	1	400	100			-3.65	0.121	-0.2861	0.00973	0.554	0.0117	1287	0.663	617	100			-2.73	0.184	-0.2141	0.01471	0.538	0.012	4.69798	4.56064	4.13114	4.2124	4.07507	3.64552	4.51979	4.3822
3	2%FeTiO2_10nm	10	2	98	69	31	3.915	4.272	7.6	160	3.15	380	4.02567	4.88	314	1532.32	100	2420	1	400	100			-1.06	0.0701	-0.08319	0.0057	0.6	0.0166	1287	0.663	617	100			0.819	0.249	0.06422	0.0195	0.669	0.0191	4.69798	4.56064	4.13114	4.2124	4.07507	3.64552	4.51979	4.3822
3	2%FeTiO2_10nm	10	2	98	69	31	3.915	4.272	7.6	160	3.15	380	4.02567	0.488	314	153.232	10	2420	1	400	100			-10.9	0.493	-0.8492	0.03686	0.682	0.0191	1287	0.663	617	100			-3.62	0.127	-0.2836	0.009758	0.696	0.0205	4.69798	4.56064	4.13114	4.2124	4.07507	3.64552	4.51979	4.3822
3	2%FeTiO2_10nm	10	2	98	69	31	3.915	4.272	7.6	160	3.15	380	4.02567	0.0488	314	15.3232	1	2420	1	400	100			-14.2	0.7	-1.111	0.0545	0.703	0.0198	1287	0.663	617	100			-11.8	0.0707	-0.9218	0.004243	0.666	0.0198	4.69798	4.56064	4.13114	4.2124	4.07507	3.64552	4.51979	4.3822
4	4%FeTiO2_8nm	8	4	96	44	56	3.916	4.267	7.5	161	3.1	390	4.11256	92.5	201	18592.5	1000	2775	1	459	100			-5.46	0.217	-0.428	0.01723	0.509	0.0106	1766	0.801	840	93.9	164	6.1	-4.08	0.0283	-0.3197	0.002404	0.528	0.012	4.40221	4.22853	3.92023	3.90779	3.73159	3.43088	4.22186	4.04945
4	4%FeTiO2_8nm	8	4	96	44	56	3.916	4.267	7.5	161	3.1	390	4.11256	9.25	201	1859.25	100	2775	1	459	100			-1.33	0.368	-0.1044	0.02896	0.649	0.0148	1766	0.801	840	93.9	164	6.1	1.26	0.218	0.099901	0.04057	0.657	0.0219	4.40221	4.22853	3.92023	3.90779	3.73159	3.43088	4.22186	4.04945
4	4%FeTiO2_8nm	8	4	96	44	56	3.916	4.267	7.5	161	3.1	390	4.11256	0.925	201	185.925	10	2775	1	459	100			-5.43	0.537	-0.4256	0.04186	0.633	0.0148	1766	0.801	840	93.9	164	6.1	-0.348	0.217	-0.02728	0.03271	0.682	0.0198	4.40221	4.22853	3.92023	3.90779	3.73159	3.43088	4.22186	4.04945
4	4%FeTiO2_8nm	8	4	96	44	56	3.916	4.267	7.5	161	3.1	390	4.11256	0.0925	201	18.5925	1	2775	1	459	100			-9.44	0.92	-0.7393	0.1495	0.639	0.0141	1766	0.801	840	93.9	164	6.1	-11.4	0.012	-0.8971	0.01294	0.694	0.0233	4.40221	4.22853	3.92023	3.90779	3.73159	3.43088	4.22186	4.04945
5	6%FeTiO2_5nm	5	6	94	31	69	3.918	4.262	7	163	3	412	4.15536	374	79	29546	1000	2568	1	679	100			-7.05	0.728	-0.5528	0.05699	0.493	0.00849	2319	0.662	1011	100			-5.09	0.352	-0.399	0.04278	0.526	0.012	3.78269	3.4901	3.47305	3.27898	2.98453	2.97128	3.6001	3.30835
5	6%FeTiO2_5nm	5	6	94	31	69	3.918	4.262	7	163	3	412	4.15536	37.4	79	2954.6	100	2568	1	679	100			-3.47	0.297	-0.2719	0.02319	0.59	0.0127	2319	0.662	1011	100			1.12	0.0849	0.08807	0.006562	0.641	0.233	3.78269	3.4901	3.47305	3.27898	2.98453	2.97128	3.6001	3.30835
5	6%FeTiO2_5nm	5	6	94	31	69	3.918	4.262	7	163	3	412	4.15536	3.74	79	295.46	10	2568	1	679	100			-8.68	0.608	-0.6805	0.04759	0.661	0.0148	2319	0.662	1011	100			-1.25	0.346	-0.09849	0.0273	0.683	0.0198	3.78269	3.4901	3.47305	3.27898	2.98453	2.97128	3.6001	3.30835
5	6%FeTiO2_5nm	5	6	94	31	69	3.918	4.262	7	163	3	412	4.15536	0.374	79	29.546	1	2568	1	679	100			-13.6	0.0707	-1.064	0.008485	0.663	0.0148	2319	0.662	1011	100			-11.4	0.0707	-0.896	0.005869	0.629	0.0184	3.78269	3.4901	3.47305	3.27898	2.98453	2.97128	3.6001	3.30835
6	8%FeTiO2_5nm	5	8	92	19	81	3.922	4.261	6	167	2.9	425	4.19659	368	79	29072	1000	1067	0.738	525	100			-7.14	0.184	-0.5595	0.01421	0.502	0.00849	1983	0.729	789	100			-7.62	0.0424	-0.5974	0.003253	0.506	0.0106	3.77837	3.48558	3.46894	3.26505	2.97359	2.95424	3.59351	3.30146
6	8%FeTiO2_5nm	5	8	92	19	81	3.922	4.261	6	167	2.9	425	4.19659	36.8	79	2907.2	100	1067	0.738	525	100			-1.9	0.12	-0.1492	0.009617	0.667	0.0156	1983	0.729	789	100			0.744	0.106	0.0583	0.008294	0.688	0.212	3.77837	3.48558	3.46894	3.26505	2.97359	2.95424	3.59351	3.30146
6	8%FeTiO2_5nm	5	8	92	19	81	3.922	4.261	6	167	2.9	425	4.19659	3.68	79	290.72	10	1067	0.738	525	100			-7.08	0.226	-0.555	0.01824	0.675	0.0163	1983	0.729	789	100			-2.76	0.168	-0.2162	0.02885	0.676	0.0205	3.77837	3.48558	3.46894	3.26505	2.97359	2.95424	3.59351	3.30146
6	8%FeTiO2_5nm	5	8	92	19	81	3.922	4.261	6	167	2.9	425	4.19659	0.368	79	29.072	1	1067	0.738	525	100			-10.7	0.566	-0.8372	0.04221	0.583	0.012	1983	0.729	789	100			-12.4	0.495	-0.9768	0.03698	0.694	0.0212	3.77837	3.48558	3.46894	3.26505	2.97359	2.95424	3.59351	3.30146
7	10%FeTiO2_5nm	5	10	90	14	86	3.888	4.244	6.1	165	2.8	440	4.19416	367	79	28993	1000	842	0.612	461	100			-8.47	0.0283	-0.6637	0.002404	0.516	0.00916	2519	0.548	1042	100			-7.62	0.707	-0.5975	0.05558	0.52	0.012	3.77393	3.4833	3.46225	3.25042	2.95472	2.94399	3.5867	3.29798
7	10%FeTiO2_5nm	5	10	90	14	86	3.888	4.244	6.1	165	2.8	440	4.19416	36.7	79	2899.3	100	842	0.612	461	100			-4.45	0.24	-0.3487	0.01874	0.599	0.0134	2519	0.548	1042	100			-1.04	0.094	-0.08169	0.007184	0.639	0.0177	3.77393	3.4833	3.46225	3.25042	2.95472	2.94399	3.5867	3.29798
7	10%FeTiO2_5nm	5	10	90	14	86	3.888	4.244	6.1	165	2.8	440	4.19416	3.67	79	289.93	10	842	0.612	461	100			-12.8	0.636	-1	0.04914	0.629	0.0134	2519	0.548	1042	100			-3.5	0.0424	-0.2745	0.003041	0.688	0.0205	3.77393	3.4833	3.46225	3.25042	2.95472	2.94399	3.5867	3.29798
7	10%FeTiO2_5nm	5	10	90	14	86	3.888	4.244	6.1	165	2.8	440	4.19416	0.367	79	28.993	1	842	0.612	461	100			-13.9	0.715	-1.016	0.09637	0.708	0.017	2519	0.548	1042	100			-14.1	0.0001	-1.105	0.002121	0.654	0.0198	3.77393	3.4833	3.46225	3.25042	2.95472	2.94399	3.5867	3.29798
8	10%FeTiO2_10nm	10	10	90	14	86	3.888	4.244	10	122	2.8	440	4.19416	45.8	314	14381.2	1000	958.8	0.692	578	94.8	120	5.2	-8.1	0.219	-0.6347	0.01683	0.511	0.00849	2060	1	450	100			-4.74	0.177	-0.3717	0.01393	0.538	0.0134	4.68063	4.54325	4.11388	4.15697	4.0209	3.5867	4.49336	4.3557
8	10%FeTiO2_10nm	10	10	90	14	86	3.888	4.244	10	122	2.8	440	4.19416	4.58	314	1438.12	100	958.8	0.692	578	94.8	120	5.2	-2.47	0.332	-0.194	0.02567	0.52	0.00919	2060	1	450	100			1.29	0.0001	0.1008	0.0001	0.686	0.0212	4.68063	4.54325	4.11388	4.15697	4.0209	3.5867	4.49336	4.3557
8	10%FeTiO2_10nm	10	10	90	14	86	3.888	4.244	10	122	2.8	440	4.19416	0.458	314	143.812	10	958.8	0.692	578	94.8	120	5.2	-10.3	0.474	-0.8059	0.03896	0.689	0.0156	2060	1	450	100			-1.98	0.0141	-0.1552	0.0007	0.697	0.0205	4.68063	4.54325	4.11388	4.15697	4.0209	3.5867	4.49336	4.3557
8	10%FeTiO2_10nm	10	10	90	14	86	3.888	4.244	10	122	2.8	440	4.19416	0.0458	314	14.3812	1	958.8	0.692	578	94.8	120	5.2	-12.8	0.283	-1.001	0.02227	0.7	0.0163	2060	1	450	100			-12.1	0.177	-0.9517	0.014	0.69	0.0205	4.68063	4.54325	4.11388	4.15697	4.0209	3.5867	4.49336	4.3557
9	TiO2_10nm	10	0	100	87	13	3.78	4.23	10	112	3.3	375	3.8385	49.8	314	15637.2	1000	2871	0.817	930	100			-2.12	0.00707	-0.1661	0.0006364	0.551	0.0099	2886	1	475	100			-3.26	0.212	-0.2555	0.01648	0.532	0.012	4.70215	4.5647	4.13558	4.22502	4.08817	3.65686	4.52605	4.38831
9	TiO2_10nm	10	0	100	87	13	3.78	4.23	10	112	3.3	375	3.8385	4.98	314	1563.72	100	2871	0.817	930	100			-3.35	0.0191	-0.2622	0.007354	0.655	0.0148	2886	1	475	100			2.32	0.205	0.1814	0.01619	0.678	0.198	4.70215	4.5647	4.13558	4.22502	4.08817	3.65686	4.52605	4.38831
9	TiO2_10nm	10	0	100	87	13	3.78	4.23	10	112	3.3	375	3.8385	0.498	314	156.372	10	2871	0.817	930	100			-12.6	0.212	-0.9905	0.01761	0.671	0.0148	2886	1	475	100			-1.71	0.311	-0.134	0.0244	0.68	0.0198	4.70215	4.5647	4.13558	4.22502	4.08817	3.65686	4.52605	4.38831
9	TiO2_10nm	10	0	100	87	13	3.78	4.23	10	112	3.3	375	3.8385	0.0498	314	15.6372	1	2871	0.817	930	100			-13.6	0.0707	-1.069	0.005657	0.697	0.0148	2886	1	475	100			-9.39	0.201	0.7359	0.07934	0.693	0.0226	4.70215	4.5647	4.13558	4.22502	4.08817	3.65686	4.52605	4.38831
10	TiO2_5nm	5	0	100	86	14	3.78	4.23	5	275	3.2	388	3.843	398	79	31442	1000	2123	0.82	766	100			0.419	1.08	0.03291	0.08431	0.52	0.00919	1909	0.42	1064	100			-3.11	0.108	-0.2439	0.04787	0.53	0.0113	3.79539	3.5042	3.4843	3.31827	3.02407	3.0103	3.6193	3.3296
10	TiO2_5nm	5	0	100	86	14	3.78	4.23	5	275	3.2	388	3.843	39.8	79	3144.2	100	2123	0.82	766	100			0.0325	0.415	0.00254	0.03254	0.615	0.0141	1909	0.42	1064	100			1.85	0.134	0.1444	0.01082	0.683	0.0191	3.79539	3.5042	3.4843	3.31827	3.02407	3.0103	3.6193	3.3296
10	TiO2_5nm	5	0	100	86	14	3.78	4.23	5	275	3.2	388	3.843	3.98	79	314.42	10	2123	0.82	766	100			0.602	0.0311	0.04716	0.002425	0.709	0.017	1909	0.42	1064	100			-2.08	0.226	-0.2766	0.01761	0.636	0.017	3.79539	3.5042	3.4843	3.31827	3.02407	3.0103	3.6193	3.3296
10	TiO2_5nm	5	0	100	86	14	3.78	4.23	5	275	3.2	388	3.843	0.398	79	31.442	1	2123	0.82	766	100			-9.81	0.983	-0.7685	0.07672	0.714	0.0163	1909	0.42	1064	100			-6.84	0.318	-0.5356	0.02475	0.694	0.0198	3.79539	3.5042	3.4843	3.31827	3.02407	3.0103	3.6193	3.3296
11	TiO2_27nm	27	0	100	70	30	3.78	4.23	27	54	3.3	440	3.915	2.46	2290	5633.4	1000	1437	0.761	698	94.5	126	5.5	-3.82	0.255	-0.2995	0.01959	0.55	0.00919	1269	0.624	679	100			-4.59	0.0495	-0.3598	0.003889	0.554	0.0127	5.9957	5.94663	5.02443	5.51858	5.46953	4.54713	5.81961	5.77053
11	TiO2_27nm	27	0	100	70	30	3.78	4.23	27	54	3.3	440	3.915	0.246	2290	563.34	100	1437	0.761	698	94.5	126	5.5	-10.4	0.07	-0.8181	0.009334	0.716	0.0163	1269	0.624	679	100			0.515	0.0495	0.04036	0.00384	0.659	0.0177	5.9957	5.94663	5.02443	5.51858	5.46953	4.54713	5.81961	5.77053
11	TiO2_27nm	27	0	100	70	30	3.78	4.23	27	54	3.3	440	3.915	0.0246	2290	56.334	10	1437	0.761	698	94.5	126	5.5	-2.88	0.156	-0.226	0.01209	0.692	0.0156	1269	0.624	679	100			-3.53	0.297	-0.2765	0.02298	0.689	0.0191	5.9957	5.94663	5.02443	5.51858	5.46953	4.54713	5.81961	5.77053
11	TiO2_27nm	27	0	100	70	30	3.78	4.23	27	54	3.3	440	3.915	0.00246	2290	5.6334	1	1437	0.761	698	94.5	126	5.5	-14.4	0.566	-1.13	0.04313	0.72	0.017	1269	0.624	679	100			-10.8	0.354	-0.8395	0.02779	0.704	0.0205	5.9957	5.94663	5.02443	5.51858	5.46953	4.54713	5.81961	5.77053
[truncated: 82 more columns]

## Sheet: Table S2
Table S2:	Groups of correlated TiO2 toxicity variables (experiments without exposure to UV) identified by the hierarchical clustering algorithm. Starting from the 105 variables obtained after cleaning the dataset, the algorithm identifies 39 clusters. One representative variable is nominated per each cluster (“1” in the “Selected” column).
	Variable	Cluster number	Selected
	Fe (%)	1	1
	TiO2 (%)	1	0
	n_rel_Fe_atoms_all	2	1
	n_rel_Fe_atoms_shell	2	0
	O_peng_avg_shell (eV)	3	0
	force_vector_length_avg_shell (eV)	3	1
	Ti_force_vector_length_coordN_avg_shell (eV)	3	0
	O_force_vector_surface_normal_component_avg_shell (eV)	3	0
	force_vector_length_avg_core (eV)	4	1
	force_vector_surface_tangent_component_avg_shell (eV)	4	0
	Ti_force_vector_length_coordN_avg_core (eV)	5	1
	O_force_vector_surface_normal_component_avg_core (eV)	5	0
	Ti_force_vector_surface_tangent_component_avg_all (eV)	5	0
	Ti_force_vector_surface_tangent_component_avg_core (eV)	5	0
	Ti_coordN_avg_shell (eV)	6	1
	Ti_peng_avg_all (eV)	7	1
	coordN_avg_shell (eV)	8	0
	Ti_coordN_avg_all (eV)	8	1
	Band Gap (eV)	9	1
	Ti_peng_avg_core (eV)	10	1
	n_atoms_all	11	1
	n_atoms_core	11	0
	n_atoms_shell	11	0
	n_Ti_atoms_all	11	0
	n_Ti_atoms_core	11	0
	n_Ti_atoms_shell	11	0
	n_O_atoms_all	11	0
	n_O_atoms_core	11	0
	n_O_atoms_shell	11	0
	coordN_avg_all (eV)	11	0
	O_coordN_avg_all (eV)	11	0
	O_peng_avg_core (eV)	12	1
	peng_avg_shell (eV)	13	1
	Lattice energy of NP / d_NP (eV/A)	14	0
	Lattice energy of NP / S_NP (eV/A^2)	14	0
	Lattice energy of NP / V_NP (eV/A^3)	14	1
	O_force_vector_length_avg_core (eV)	15	1
	force_vector_surface_normal_component_avg_all (eV)	16	1
	Ti_force_vector_surface_normal_component_avg_all (eV)	17	1
	O_force_vector_surface_normal_component_avg_all (eV)	17	0
	Ti_force_vector_surface_normal_component_avg_shell (eV)	18	1
	BET (nm)	19	0
	SA (m^2/g)	19	1
	n_Fe_atoms_shell	20	1
	O_coordN_avg_shell (eV)	21	1
	n_Fe_atoms_all	22	1
	n_Fe_atoms_core	22	0
	Rutile density (g/cm^3)	23	1
	Fe_peng_avg_all (eV)	23	0
	Fe_peng_avg_core (eV)	23	0
	Fe_peng_avg_shell (eV)	23	0
	Fe_coordN_avg_all (eV)	23	0
	Fe_coordN_avg_core (eV)	23	0
	Fe_coordN_avg_shell (eV)	23	0
	force_vector_surface_normal_component_avg_core (eV)	24	1
	Anatase density (g/cm^3)	25	1
	NON-UV-DLS % in peak 1	26	1
	UV absorbance (wavelength)	27	1
	Fe_force_vector_surface_normal_component_avg_all (eV)	28	1
	Fe_force_vector_surface_normal_component_avg_shell (eV)	28	0
	NON-UV-DLS Peak 1	29	1
	O_force_vector_surface_tangent_component_avg_shell (eV)	30	1
	Zeta NON-UV (mV)	31	1
	Mob_NON-UV (µmcm/Vs)	31	0
	DLS NON-UV (nm)	32	1
	PDI for DLS NON-UV	32	0
	Ti_force_vector_surface_normal_component_avg_core (eV)	33	0
	Fe_force_vector_surface_normal_component_avg_core (eV)	33	1
	O_force_vector_surface_tangent_component_avg_core (eV)	33	0
	n_rel_Fe_atoms_core	34	1
	Ti_coordN_avg_core (eV)	34	0
	Fe_force_vector_length_avg_all (eV)	34	0
	Fe_force_vector_length_avg_core (eV)	34	0
	Fe_force_vector_length_avg_shell (eV)	34	0
	Fe_force_vector_surface_tangent_component_avg_all (eV)	34	0
	Fe_force_vector_surface_tangent_component_avg_core (eV)	34	0
	Fe_force_vector_surface_tangent_component_avg_shell (eV)	34	0
	peng_avg_all (eV)	35	1
	Ti_peng_avg_shell (eV)	35	0
	O_peng_avg_all (eV)	35	0
	Lattice energy of NP (eV)	35	0
	Relative lattice energy of NP to bulk material (E_L_bulk-E_L_NP) (eV)	35	0
	force_vector_length_avg_all (eV)	35	0
	Ti_force_vector_length_coordN_avg_all (eV)	35	0
	O_force_vector_length_avg_all (eV)	35	0
	force_vector_surface_tangent_component_avg_all (eV)	35	0
	O_force_vector_surface_tangent_component_avg_all (eV)	35	0
	peng_avg_core (eV)	36	1
	coordN_avg_core (eV)	36	0
	force_vector_surface_tangent_component_avg_core (eV)	36	0
	Ti_force_vector_surface_tangent_component_avg_shell (eV)	36	0
	Nominal Diameter (nm)	37	1
	Individual Particle surface (nm^2)	37	0
	NP diameter (A)	37	0
	NP surface area (A^2)	37	0
	NP volume (A^3)	37	0
	O_force_vector_length_avg_shell (eV)	37	0
	Anatase (%)	38	1
	Rutile (%)	38	0
	NM density (g/cm^3)	38	0
	force_vector_surface_normal_component_avg_shell (eV)	38	0
	Particle number (10^6)	39	0
	Total Particle surface (nm^2)	39	0
	Concentration (mg/L)	39	1
	Conductivity NON-UV (mS/cm)	39	0

## Sheet: Table S3
Table S3:	Groups of correlated TiO2 toxicity variables (experiments exposed to UV) identified by the hierarchical clustering algorithm. Starting from the 105 variables obtained after cleaning the dataset, the algorithm identifies 40 clusters. One representative variable is nominated per each cluster (“1” in the “Selected” column).
	Variable	Cluster number	Selected
	Fe (%)	1	1
	TiO2 (%)	1	0
	n_rel_Fe_atoms_all	2	1
	n_rel_Fe_atoms_shell	2	0
	O_peng_avg_shell (eV)	3	0
	force_vector_length_avg_shell (eV)	3	1
	Ti_force_vector_length_coordN_avg_shell (eV)	3	0
	O_force_vector_surface_normal_component_avg_shell (eV)	3	0
	force_vector_length_avg_core (eV)	4	1
	force_vector_surface_tangent_component_avg_shell (eV)	4	0
	Ti_force_vector_length_coordN_avg_core (eV)	5	1
	O_force_vector_surface_normal_component_avg_core (eV)	5	0
	Ti_force_vector_surface_tangent_component_avg_all (eV)	5	0
	Ti_force_vector_surface_tangent_component_avg_core (eV)	5	0
	Ti_coordN_avg_shell (eV)	6	1
	Ti_peng_avg_all (eV)	7	1
	coordN_avg_shell (eV)	8	0
	Ti_coordN_avg_all (eV)	8	1
	Band Gap (eV)	9	1
	Ti_peng_avg_core (eV)	10	1
	n_atoms_all	11	1
	n_atoms_core	11	0
	n_atoms_shell	11	0
	n_Ti_atoms_all	11	0
	n_Ti_atoms_core	11	0
	n_Ti_atoms_shell	11	0
	n_O_atoms_all	11	0
	n_O_atoms_core	11	0
	n_O_atoms_shell	11	0
	coordN_avg_all (eV)	11	0
	O_coordN_avg_all (eV)	11	0
	O_peng_avg_core (eV)	12	1
	peng_avg_shell (eV)	13	1
	Lattice energy of NP / d_NP (eV/A)	14	0
	Lattice energy of NP / S_NP (eV/A^2)	14	0
	Lattice energy of NP / V_NP (eV/A^3)	14	1
	O_force_vector_length_avg_core (eV)	15	1
	force_vector_surface_normal_component_avg_all (eV)	16	1
	Ti_force_vector_surface_normal_component_avg_all (eV)	17	1
	O_force_vector_surface_normal_component_avg_all (eV)	17	0
	Ti_force_vector_surface_normal_component_avg_shell (eV)	18	1
	BET (nm)	19	0
	SA (m^2/g)	19	1
	n_Fe_atoms_shell	20	1
	O_coordN_avg_shell (eV)	21	1
	n_Fe_atoms_all	22	1
	n_Fe_atoms_core	22	0
	Rutile density (g/cm^3)	23	1
	Fe_peng_avg_all (eV)	23	0
	Fe_peng_avg_core (eV)	23	0
	Fe_peng_avg_shell (eV)	23	0
	Fe_coordN_avg_all (eV)	23	0
	Fe_coordN_avg_core (eV)	23	0
	Fe_coordN_avg_shell (eV)	23	0
	force_vector_surface_normal_component_avg_core (eV)	24	1
	Anatase density (g/cm^3)	25	1
	UV absorbance (wavelength)	26	1
	Fe_force_vector_surface_normal_component_avg_all (eV)	27	1
	Fe_force_vector_surface_normal_component_avg_shell (eV)	27	0
	UV-DLS Peak 1	28	1
	PDI for DLS UV	29	1
	O_force_vector_surface_tangent_component_avg_shell (eV)	30	1
	DLS UV (nm)	31	1
	Ti_force_vector_surface_normal_component_avg_core (eV)	32	0
	Fe_force_vector_surface_normal_component_avg_core (eV)	32	1
	O_force_vector_surface_tangent_component_avg_core (eV)	32	0
	UV-DLS % in peak 1	33	1
	Particle number (10^6)	34	0
	Total Particle surface (nm^2)	34	0
	Concentration (mg/L)	34	1
	Conductivity UV (mS/cm)	34	0
	Zeta UV (mV)	35	1
	Mob UV (µmcm/Vs)	35	0
	n_rel_Fe_atoms_core	36	1
	Ti_coordN_avg_core (eV)	36	0
	Fe_force_vector_length_avg_all (eV)	36	0
	Fe_force_vector_length_avg_core (eV)	36	0
	Fe_force_vector_length_avg_shell (eV)	36	0
	Fe_force_vector_surface_tangent_component_avg_all (eV)	36	0
	Fe_force_vector_surface_tangent_component_avg_core (eV)	36	0
	Fe_force_vector_surface_tangent_component_avg_shell (eV)	36	0
	peng_avg_all (eV)	37	1
	Ti_peng_avg_shell (eV)	37	0
	O_peng_avg_all (eV)	37	0
	Lattice energy of NP (eV)	37	0
	Relative lattice energy of NP to bulk material (E_L_bulk-E_L_NP) (eV)	37	0
	force_vector_length_avg_all (eV)	37	0
	Ti_force_vector_length_coordN_avg_all (eV)	37	0
	O_force_vector_length_avg_all (eV)	37	0
	force_vector_surface_tangent_component_avg_all (eV)	37	0
	O_force_vector_surface_tangent_component_avg_all (eV)	37	0
	peng_avg_core (eV)	38	1
	coordN_avg_core (eV)	38	0
	force_vector_surface_tangent_component_avg_core (eV)	38	0
	Ti_force_vector_surface_tangent_component_avg_shell (eV)	38	0
	Nominal Diameter (nm)	39	1
	Individual Particle surface (nm^2)	39	0
	NP diameter (A)	39	0
	NP surface area (A^2)	39	0
	NP volume (A^3)	39	0
	O_force_vector_length_avg_shell (eV)	39	0
	Anatase (%)	40	1
	Rutile (%)	40	0
	NM density (g/cm^3)	40	0
	force_vector_surface_normal_component_avg_shell (eV)	40	0

## Sheet: Table S4
Table S4:	Short name and classification of the representative variables (uncorrelated between each other) identified by the clustering step (no exposure to UV).
	Variable	Classification	Short variable name
	Nominal Diameter (nm)	Material	x1
	Fe (%)	Material	x2
	Anatase (%)	Material	x3
	Anatase density (g/cm^3)	Material	x4
	Rutile density (g/cm^3)	Material	x5
	SA (m^2/g)	Material	x6
	Band Gap (eV)	Material	x7
	UV absorbance (wavelength)	Material	x8
	Concentration (mg/L)	Dose	x9
	DLS NON-UV (nm)	Environment	x10
	NON-UV-DLS peak 1	Environment	x11
	NON-UV-DLS % in peak 1	Environment	x12
	Zeta NON-UV (mV)	Environment	x13
	n_atoms_all	Modelling	x14
	n_Fe_atoms_all	Modelling	x15
	n_Fe_atoms_shell	Modelling	x16
	n_rel_Fe_atoms_all	Modelling	x17
	n_rel_Fe_atoms_core	Modelling	x18
	peng_avg_all (eV)	Modelling	x19
	peng_avg_core (eV)	Modelling	x20
	peng_avg_shell (eV)	Modelling	x21
	Ti_peng_avg_all (eV)	Modelling	x22
	Ti_peng_avg_core (eV)	Modelling	x23
	O_peng_avg_core (eV)	Modelling	x24
	Ti_coordN_avg_all (eV)	Modelling	x25
	Ti_coordN_avg_shell (eV)	Modelling	x26
	O_coordN_avg_shell (eV)	Modelling	x27
	Lattice energy of NP /V_NP (eV/A^3)	Modelling	x28
	force_vector_length_avg_core (eV)	Modelling	x29
	force_vector_length_avg_shell (eV)	Modelling	x30
	Ti_force_vector_length_coordN_avg_core (eV)	Modelling	x31
	O_force_vector_length_avg_core (eV)	Modelling	x32
	force_vector_surface_normal_component_avg_all (eV)	Modelling	x33
	force_vector_surface_normal_component_avg_core (eV)	Modelling	x34
	Ti_force_vector_surface_normal_component_avg_all (eV)	Modelling	x35
	Ti_force_vector_surface_normal_component_avg_shell (eV)	Modelling	x36
	Fe_force_vector_surface_normal_component_avg_all (eV)	Modelling	x37
	Fe_force_vector_surface_normal_component_avg_core (eV)	Modelling	x38
	O_force_vector_surface_tangent_component_avg_shell (eV)	Modelling	x39

## Sheet: Table S5
Table S5:	Short name and classification of the representative variables (uncorrelated between each other) identified by the clustering step (exposure to UV).
	Variable	Classification	Short variable name
	Nominal Diameter (nm)	Material	x1
	Fe (%)	Material	x2
	Anatase (%)	Material	x3
	Anatase density (g/cm^3)	Material	x4
	Rutile density (g/cm^3)	Material	x5
	SA (m^2/g)	Material	x6
	Band Gap (eV)	Material	x7
	UV absorbance (wavelength)	Material	x8
	Concentration (mg/L)	Dose	x9
	DLS-UV (nm)	Environment	x10
	PDI for DLS UV	Environment	x10bis
	UV-DLS peak 1	Environment	x11
	UV-DLS % in peak 1	Environment	x12
	Zeta UV (mV)	Environment	x13
	n_atoms_all	Modelling	x14
	n_Fe_atoms_all	Modelling	x15
	n_Fe_atoms_shell	Modelling	x16
	n_rel_Fe_atoms_all	Modelling	x17
	n_rel_Fe_atoms_core	Modelling	x18
	peng_avg_all (eV)	Modelling	x19
	peng_avg_core (eV)	Modelling	x20
	peng_avg_shell (eV)	Modelling	x21
	Ti_peng_avg_all (eV)	Modelling	x22
	Ti_peng_avg_core (eV)	Modelling	x23
	O_peng_avg_core (eV)	Modelling	x24
	Ti_coordN_avg_all (eV)	Modelling	x25
	Ti_coordN_avg_shell (eV)	Modelling	x26
	O_coordN_avg_shell (eV)	Modelling	x27
	Lattice energy of NP /V_NP (eV/A^3)	Modelling	x28
	force_vector_length_avg_core (eV)	Modelling	x29
	force_vector_length_avg_shell (eV)	Modelling	x30
	Ti_force_vector_length_coordN_avg_core (eV)	Modelling	x31
	O_force_vector_length_avg_core (eV)	Modelling	x32
	force_vector_surface_normal_component_avg_all (eV)	Modelling	x33
	force_vector_surface_normal_component_avg_core (eV)	Modelling	x34
	Ti_force_vector_surface_normal_component_avg_all (eV)	Modelling	x35
	Ti_force_vector_surface_normal_component_avg_shell (eV)	Modelling	x36
	Fe_force_vector_surface_normal_component_avg_all (eV)	Modelling	x37
	Fe_force_vector_surface_normal_component_avg_core (eV)	Modelling	x38
	O_force_vector_surface_tangent_component_avg_shell (eV)	Modelling	x39

## Sheet: Table S6
Table S6:	Summary of the effect concentrations (ECx with 95% confidence intervals – CI), expressed as mg TiO2 per ml (pre-exposure concentration), for Enchytraeus crypticus pre-exposed to the seceral TiO2 NMs. The models used are Threshold sigmoid 2 parameters (Thres2P) or Logistic 2 parameters (Log2P). S: slope; y0: top point; ND: not determined. Graphs with results in terms of survival and reproduction o…
			UV	Non-UV			Model (parameters)	Graphs (Non-UV)
	TiO2 NM	Endpoints	ECx	EC10 (95% CI)	EC50 (95% CI)	EC90 (95% CI)
	1%FeTiO2_11nm	Surv	ND	ND	ND	ND
		Reprod	ND	ND	ND	ND
	2%FeTiO2_10nm	Surv	ND	ND	ND	ND
		Reprod	ND	ND	ND	ND
	4%FeTiO2_8nm	Surv	ND	ND	ND	ND
		Reprod	ND	ND	ND	ND
	6%FeTiO2_5nm	Surv	ND	447 (-2035-2928)	1022 (495-1548)	1377 (-453-3207)	Thres2P (S:0.001; Y0:6.719)
		Reprod	ND	-380 (-1113-353)	555 (28-1082)	1490 (128-2853)	Log2P (S:0.001; Y0:179)
	8%FeTiO2_5nm	Surv	ND	887 (-14609-16383)	1130 (-16668-18928)	1373 (ND)	Log2P (S:0.002; Y0:9.156)
		Reprod	ND	ND	ND	ND
	10%FeTiO2_5nm	Surv	ND	ND	ND	ND
		Reprod	ND	ND	ND	ND
	10%FeTiO2_10nm	Surv	ND	1007 (708-1306)	1409 (-6701-9518)	1810 (-14254-17874)	Log2P (S:0.001; Y0:8.844)
		Reprod	ND	834 (ND)	1007 (-17990-20004)	1181 (ND)	Log2P (S:0.003; Y0:174.56)
	TiO2_5nm	Surv	ND	ND	ND	ND
		Reprod	ND	ND	ND	ND
	TiO2_10nm	Surv	ND	-1.0 (-11.5-9.5)	8.4 (2.0-14.9)	17.9 (2.4-33.4)	Log2P (S:0.058; Y0: 8.875)
		Reprod	ND	ND	ND	ND
	TiO2_12nm	Surv	ND	ND	ND	ND
		Reprod	ND	ND	ND	ND
	TiO2_27nm	Surv	ND	ND	ND	ND
		Reprod	ND	ND	ND	ND
